# Supplementary material
Source: HighWire-hosted journal article supplement (https://cmajopen.ca/highwire/filestream/90394/field_highwire_adjunct_files/1/open-2022-0211-2-at.pdf)
Supplement: open-2022-0211-2-at.pdf [file open-2022-0211-2-at.pdf]

## APPENDIX 2: Demographics survey

The following form is anonymous, so we cannot tell who filled it out. By completing the form below, you are providing consent for us to use this information anonymously to report our overall study demographics.

1. Focus group number
2. Gender identity
  - Man
  - Woman
  - Non-binary
  - Two-spirit
  - Other: \_\_\_\_\_
  - Prefer not to say
3. Age range
  - 18-35
  - 36-55
  - 56-75
  - 75+
  - Prefer not to say
4. In what provinces/territories do you primarily receive healthcare? (check all that apply)
  - Alberta
  - British Columbia
  - Manitoba
  - New Brunswick
  - Newfoundland & Labrador
  - Northwest Territories
  - Nova Scotia
  - Nunavut
  - Ontario
  - Prince Edward Island
  - Quebec
  - Saskatchewan
  - Yukon
5. Would you classify the area that you live as...
  - Urban/Population centre
  - Rural
  - Unsure
  - Prefer not to say

6. *[If urban/population centre selected]* What is the population of your city?
- 1,000-29,999
  - 30,000-99,999
  - 100,000-499,999
  - 500,000+
  - Unsure
  - Prefer not to say
7. Do you identify as an Indigenous person
- Yes
  - No
  - Prefer not to say
8. Do you identify as a member of a visible minority?
- Yes
    - Please describe how you identify: \_\_\_\_
  - No
  - Prefer not to say
9. Preferred language
- English
  - French
  - Other
  - Prefer not to say
10. What is the highest level of education you have completed?
- Some high school, no diploma
  - High school graduate
  - Some post-secondary studies, no degree
  - College or vocational degree
  - Undergraduate degree
  - Post-graduate degree
  - Other, please specify: \_\_\_\_\_
  - Prefer not to say
11. How would you classify your chronic illness?
- Primarily physical
  - Primarily mental
  - Both
  - Prefer not to say
12. How would you rate your overall satisfaction with the Canadian Healthcare System?
- Likert scale from 1-10, where 1 is not satisfied at all and 10 is completely satisfied
